# Supplementary material for: Effect of the polymer nature on the properties of composite solid electrolytes based on the organic ionic plastic crystal HMGFSI
Source: Royal Society of Chemistry journal article supplement (doi:10.1039/d5cp00770d), 2025-01-01
Supplement: d5cp00770d1.pdf [file d5cp00770d1.pdf]

### Supplementary Information

#### Density of OIPC and polymers

| Material      | Density<br>(g/cm <sup>3</sup> ) |
|---------------|---------------------------------|
| HMGFSI        | 1.47                            |
| NPs-large-low | 1.85                            |
| NPs-small-low | 1.55                            |
| NPs-large-med | 1.40                            |
| Linear-high   | 1.46                            |
